# Supplementary material for: A post-publication analysis of the idealized upper reference value of 2.5 mIU/L for TSH: Time to support the thyroid axis with magnesium and iron especially in the setting of reproduction medicine
Source: PubMed Central journal article supplement — BBA Clin. 2017 Mar 19;7:115–9. doi: 10.1016/j.bbacli.2017.03.003 (PMC5385584; doi:10.1016/j.bbacli.2017.03.003), 2017-03-19
Supplement: mmc1.pdf [file mmc1.pdf]

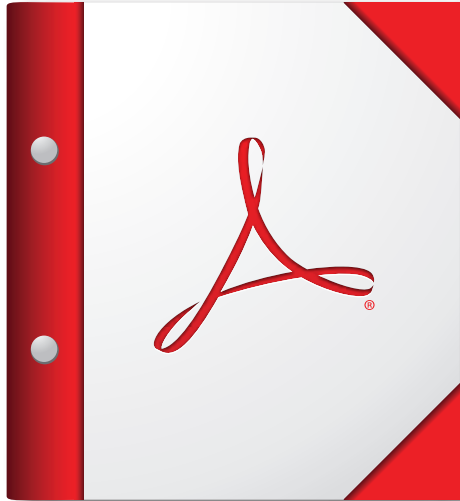

**For the best experience, open this PDF portfolio in  
Acrobat 9 or Adobe Reader 9, or later.**

[Get Adobe Reader Now!](#)
